# Supplementary material for: Comparison of carbon sources in a partial denitrification/anammox MBBR using glycerol, acetate, and methanol
Source: Royal Society of Chemistry journal article supplement (doi:10.1039/d2ew00332e), 2023-01-01
Supplement: d2ew00332e1.pdf [file d2ew00332e1.pdf]

## Supporting Information

### Nitrogen Polishing in a Partial Denitrification/Anammox MBBR Using Glycerol, Acetate, and Methanol

Stephanie Klaus<sup>1,2\*</sup>, Cody Campolong<sup>1,2</sup>, Alex Rosenthal<sup>3</sup>, Fabrizio Sabba<sup>3</sup>, Matthew Baidme<sup>4</sup>, George Wells<sup>3</sup>, Haydee de Clippeleir<sup>5</sup>, Kartik Chandran<sup>4</sup>, and Charles Bott<sup>2</sup>

<sup>1</sup>Hampton Roads Sanitation District, 1434 Air Rail Ave., Virginia Beach, Virginia

<sup>2</sup>Civil and Environmental Engineering Department, Virginia Tech, Blacksburg, Virginia

<sup>3</sup>Department of Civil and Environmental Engineering, Northwestern University, Evanston, Illinois

<sup>4</sup>Department of Earth and Environmental Engineering, Columbia University, 500 West 120th Street

<sup>5</sup>DC Water Authority, 5000 Overlook Ave. SW, Washington DC

\*Corresponding author: e-mail [sklaus@hrsdc.com](mailto:sklaus@hrsdc.com)

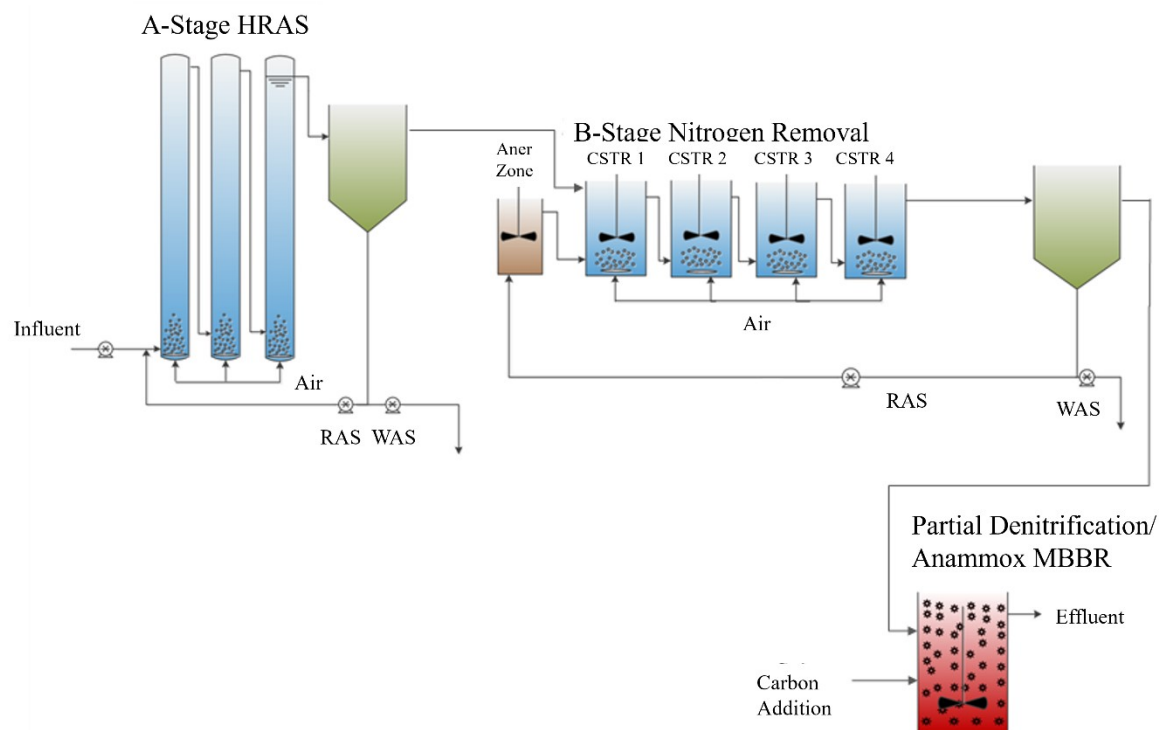

Figure S1: Pilot process flow diagram

**Table S1: 16S rRNA-targeted oligonucleotide probes used in this study.**

| Probe                       | Sequence (5' to 3')                | FA (%) | Specificity                                                                                                   | Reference            |
|-----------------------------|------------------------------------|--------|---------------------------------------------------------------------------------------------------------------|----------------------|
| <b>AOB Mix</b>              |                                    |        |                                                                                                               |                      |
| NEU                         | CCC CTC TGC TGC<br>ACT CTA         | 35     | Most halophilic and halotolerant<br>Nitrosomonas spp.                                                         | Wagner et al. 1995   |
| CTE (NEU Competitor)        | TTC CAT CCC CCT<br>CTG CCG         | 35     | Unlabeled together with NEU<br>Comamonas spp., Acidovorax<br>spp., Hydrogenophaga spp.,<br>Aquaspirillum spp. | Wagner et al. 1995   |
| Nso1225                     | CGC CAT TGT ATT<br>ACG TGT GA      | 35     | Ammonia-oxidizing $\beta$ -<br>proteobacteria                                                                 | Mobarry et al. 1996  |
| Cluster6a192                | CTT TCG ATC CCC<br>TAC TTT CC      | 35     | Nitrosomonas oligotropha<br>lineage (Cluster 6a)                                                              | Adamczyk et al. 2003 |
| Cluster6a 192<br>Competitor | CTT TCG ATC CCC<br>TGC TTT CC      | 35     | Competitor for Cluster6a192                                                                                   | Adamczyk et al. 2003 |
| <b>Nitrospira Mix</b>       |                                    |        |                                                                                                               |                      |
| Ntspa662                    | GGA ATT CCG CGC<br>TCC TCT         | 35     | Genus Nitrospira                                                                                              | Daims et al. 2001    |
| Ntspa662 Competitor         | GGA ATT CCG CTC<br>TCC TCT         | 35     | Competitor for Ntspa662                                                                                       | Daims et al. 2001    |
| Ntspa712                    | CGC CTT CGC CAC<br>CGG CCT TCC     | 35     | Most members of the phylum<br>Nitrospirae                                                                     | Daims et al. 2001    |
| Ntspa712 Competitor         | CGC CTT CGC CAC<br>CGG TGT TCC     | 35     | Competitor for Ntspa712                                                                                       | Daims et al. 2001    |
| <b>Anammox Mix</b>          |                                    |        |                                                                                                               |                      |
| Amx820                      | AAA ACC CCT CTA<br>CTT AGT GCC C   | 35     | Brocadia anammoxidans<br>Kuenenia stuttgartiensis                                                             | Schmid et al. 2000   |
| Bfu 613                     | GGA TGC CGT TCT<br>TCC GTT AAG CGG | 35     | Brocadia fulgida <sup>*</sup>                                                                                 | Kartal et al. 2008   |
| <b>NON Eub</b>              | ACT CCT ACG GGA<br>GGC AGC         | 35     | Negative control for nonspecific<br>binding                                                                   | Wallner et al. 1993  |

**Table S2: Summary of qPCR primers.**

| Target Gene        | qPCR Primer | Nucleotide Sequence (5'-3') | Base Pairs | Reference                |
|--------------------|-------------|-----------------------------|------------|--------------------------|
| Universal 16S rRNA | 1055F       | ATGGCTGTCGTCAGCT            | 353        | Ferris et al, 1996       |
|                    | 1392R       | ACGGGCGGTGTGTAC             |            |                          |
| Anammox 16S rRNA   | Pla46F      | GGATTAGGCATGCAAGTC          | 674        | van der Star et al, 2007 |
|                    | Amx667R     | ACCAGAAGTTCCACTCTC          |            |                          |

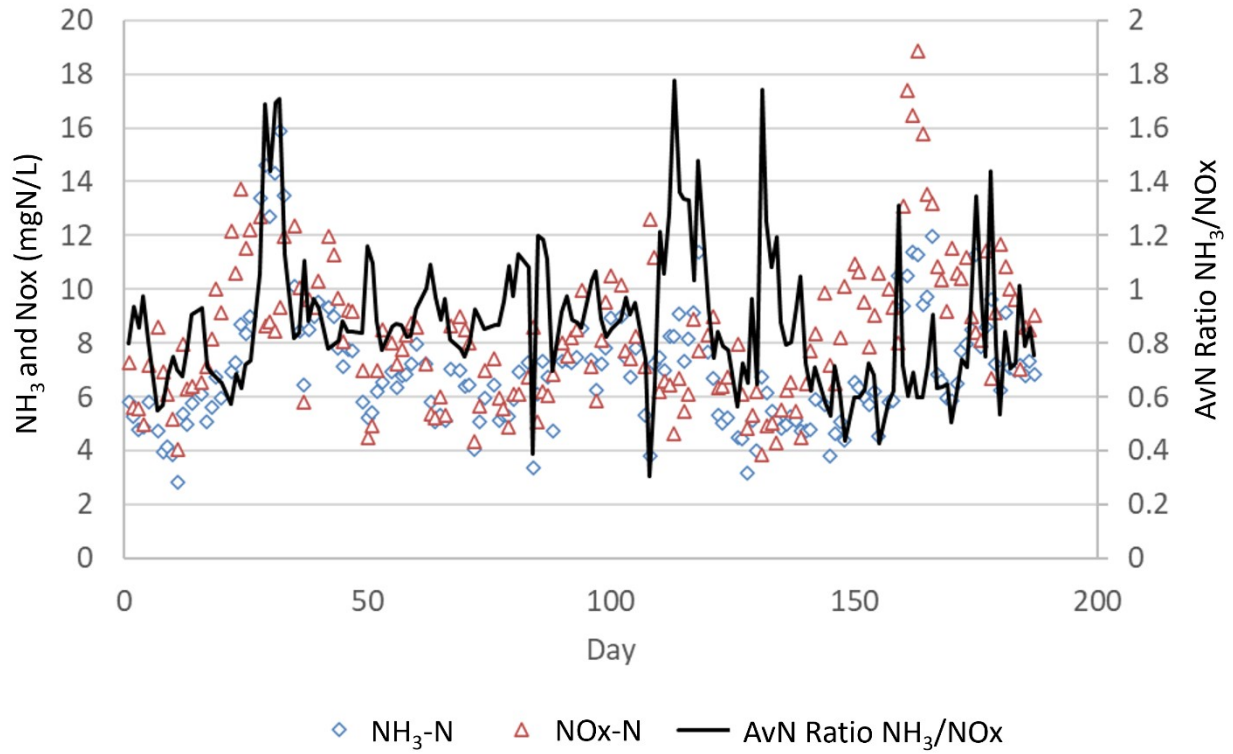

**Figure S2: MBBR influent  $\text{NH}_3\text{-N}$ ,  $\text{NO}_x\text{-N}$ , and AvN ratio ( $\text{NH}_3\text{-N}/\text{NO}_x\text{-N}$ ). Phase I: Day 1 – 60, Phase II: Day 61 – 108, Phase III: Day 109 – 116, Phase IV: Day 117 – 128, Phase V: Day 129 – 187.**

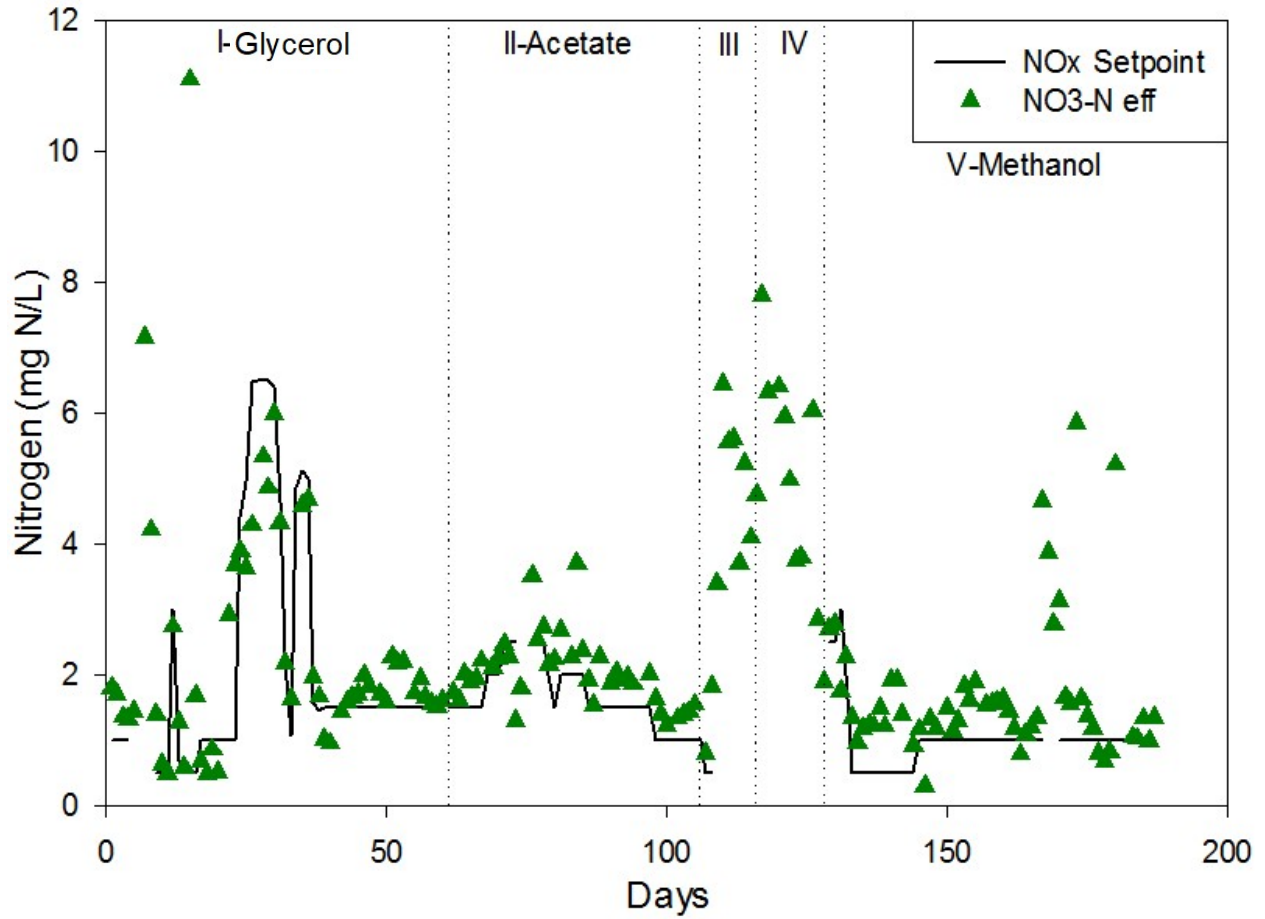

Figure S3: MBBR effluent NO<sub>3</sub>-N composite values and MBBR effluent NO<sub>x</sub> setpoint. If no NO<sub>x</sub> setpoint is shown, then the carbon dosing pump was in manual control at a constant rate. Vertical blue lines indicate start and end dates for each phase.

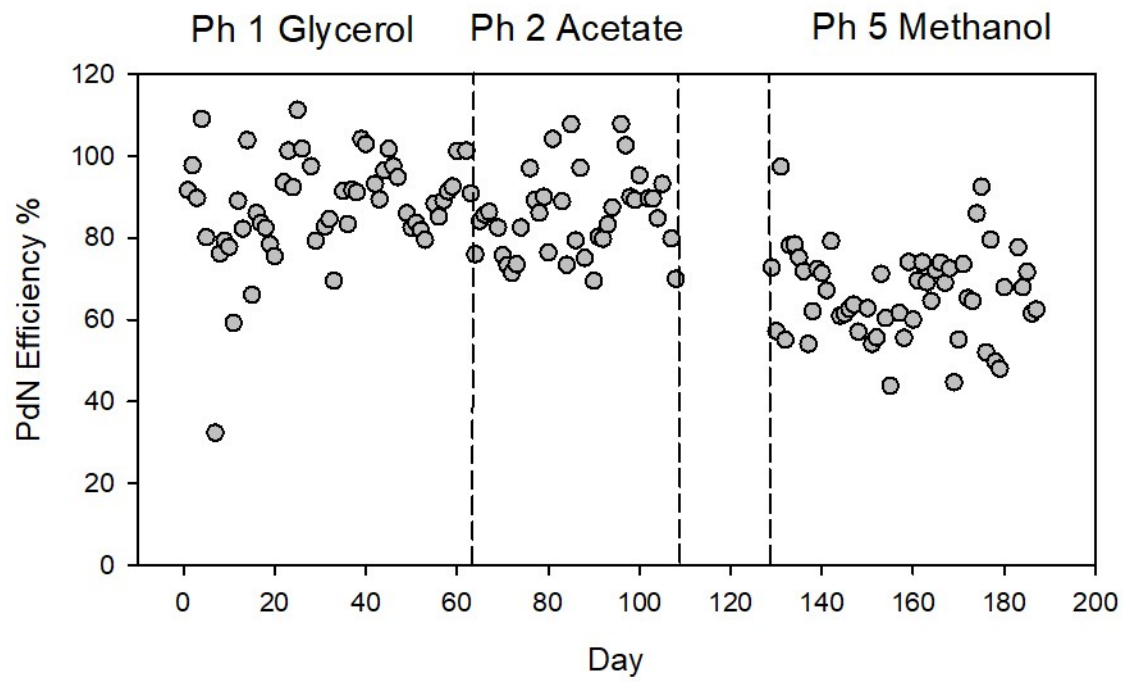

Figure S4: PdN efficiency. Phases 3 and 4 not shown because little to no carbon was added during these phases.

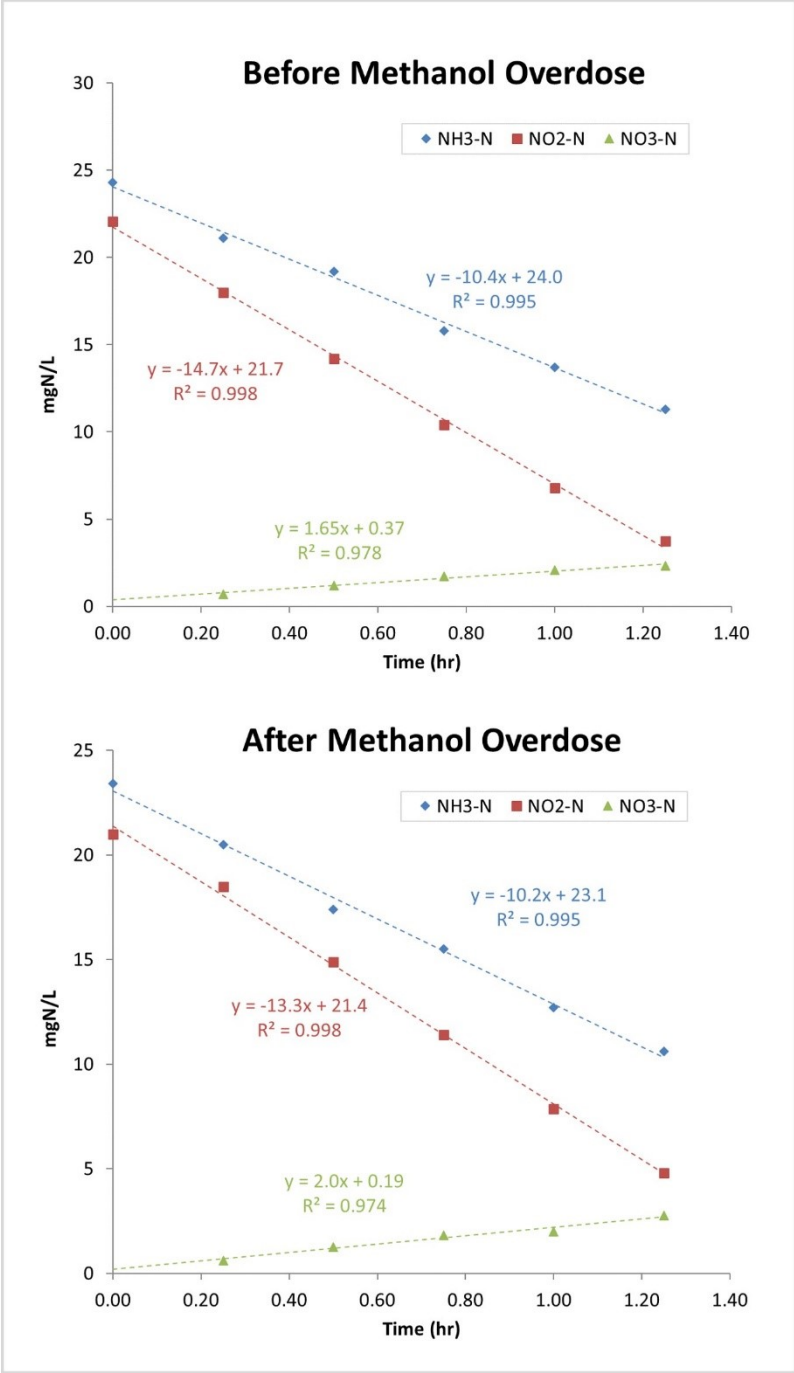

Figure S5: MBBR overdosing of methanol experiment results. Top - AMX max activity before overdosing of methanol. Bottom - AMX max activity after methanol overdosing.

## Heterotrophic Assimilation Calculation

Example calculation for methanol assuming anoxic yield for methanol = 0.4 gCOD/gCOD and 20 mgCOD/L added. A yield of 0.55 gCOD/gCOD was used for glycerol, and 0.43 gCOD/gCOD was used for acetate<sup>1,2</sup>. This represents the maximum amount of ammonia that could have been assimilated assuming no decay.

Molecular weight of biomass,  $C_5H_7O_2N = 113 \text{ g/mol}$

Molecular weight of  $O_2 = 32 \text{ g/mol}$

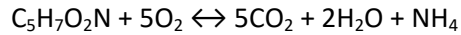

$(5 \text{ mol } O_2 * 32 \text{ g } O_2/\text{mol } O_2) / (1 \text{ mol } C_5H_7O_2N * 113 \text{ g } C_5H_7O_2N / \text{mol } C_5H_7O_2N) = 1.42 \text{ g COD/g biomass as VSS}$

Nitrogen content of biomass = 1 mol N/mol  $C_5H_7O_2N$

$(1 \text{ mol N} * 14 \text{ g N/mol N}) / 113 \text{ g } C_5H_7O_2N / \text{mol } C_5H_7O_2N = 0.124 \text{ g } NH_4\text{-N assimilated/g biomass VSS produced}$

$(0.124 \text{ g } NH_4\text{-N assimilated/g biomass VSS}) * (1 \text{ g biomass VSS}/1.42 \text{ g COD}) * (20 \text{ mg COD/L} * 0.4 \text{ g/g}) =$

**0.70 mg  $NH_4\text{-N/L}$  assimilated.**

1 S. Ledwell, M. Fabiyi and G. Farmer, Optimizing Denitrification with non-Methanol Carbon Sources in Deep-Bed Denitrification Filter Technologies, *Optimizing Denitrification with non-Methanol Carbon Sources in Deep-Bed Denitrification Filter Technologies*, 2010, **2010**, 548–565.

2 C. P. L. Grady, G. T. Daigger and H. C. Lim, *Biological wastewater treatment / edited by C. P. Leslie Grady, Jr., Glen T. Daigger, Henry C. Lim.*, Marcel Dekker, New York, Second edition revised and expanded., 1999.
